# Supplementary material for: Health-related quality of life in young survivors of childhood cancer
Source: Springer Nature journal article supplement (doi:10.1007/s11136-015-0961-3), 2015-03-17
Supplement: MOESM1 [file 284304]

**Supplemental Table 1: Parametric test results of the KIDSCREEN-27: Missing data, floor and ceiling effects, Cronbach’s alpha**

|  | **Missings**  **N (%)** | **Floora**  **N (%)** | **Ceilingb**  **N (%)** | **Cronbach’s alpha** |
| --- | --- | --- | --- | --- |
| **Physical well-being** |  |  |  |  |
| Self-reported | 3 (1) | 0 (0) | 33 (8) | 0.78 |
| Parent-reported | 7 (2) | 0 (0) | 28 (7) | 0.84 |
| **Psychological well-being** |  |  |  |  |
| Self-reported | 3 (1) | 0 (0) | 51 (13) | 0.73 |
| Parent-reported | 10 (2) | 0 (0) | 24 (6) | 0.78 |
| **Autonomy and parents** |  |  |  |  |
| Self-reported | 8 (2) | 0 (0) | 49 (12) | 0.75 |
| Parent-reported | 23 (6) | 1 (<1) | 26 (7) | 0.82 |
| **Peers and social support** |  |  |  |  |
| Self-reported | 1 (<1) | 6 (2) | 84 (21) | 0.87 |
| Parent-reported | 5 (1) | 8 (2) | 22 (5) | 0.90 |
| **School environment** |  |  |  |  |
| Self-reported | 5 (1) | 0 (0) | 54 (14) | 0.80 |
| Parent-reported | 7 (2) | 1 (<0) | 36 (9) | 0.81 |

aFloor effect occurred if a person always answered with the lowest category (indicating very poor HRQoL) within one or more of the five dimensions. bCeiling effect occurred if a person always answered with the highest category (indicating very high HRQoL) within one or more of the five dimensions.
